# Supplementary material
Source: PubMed Central journal article supplement (PMC4258436)
Supplement: NIHMS629495-supplement-2.pdf [file NIHMS629495-supplement-2.pdf]

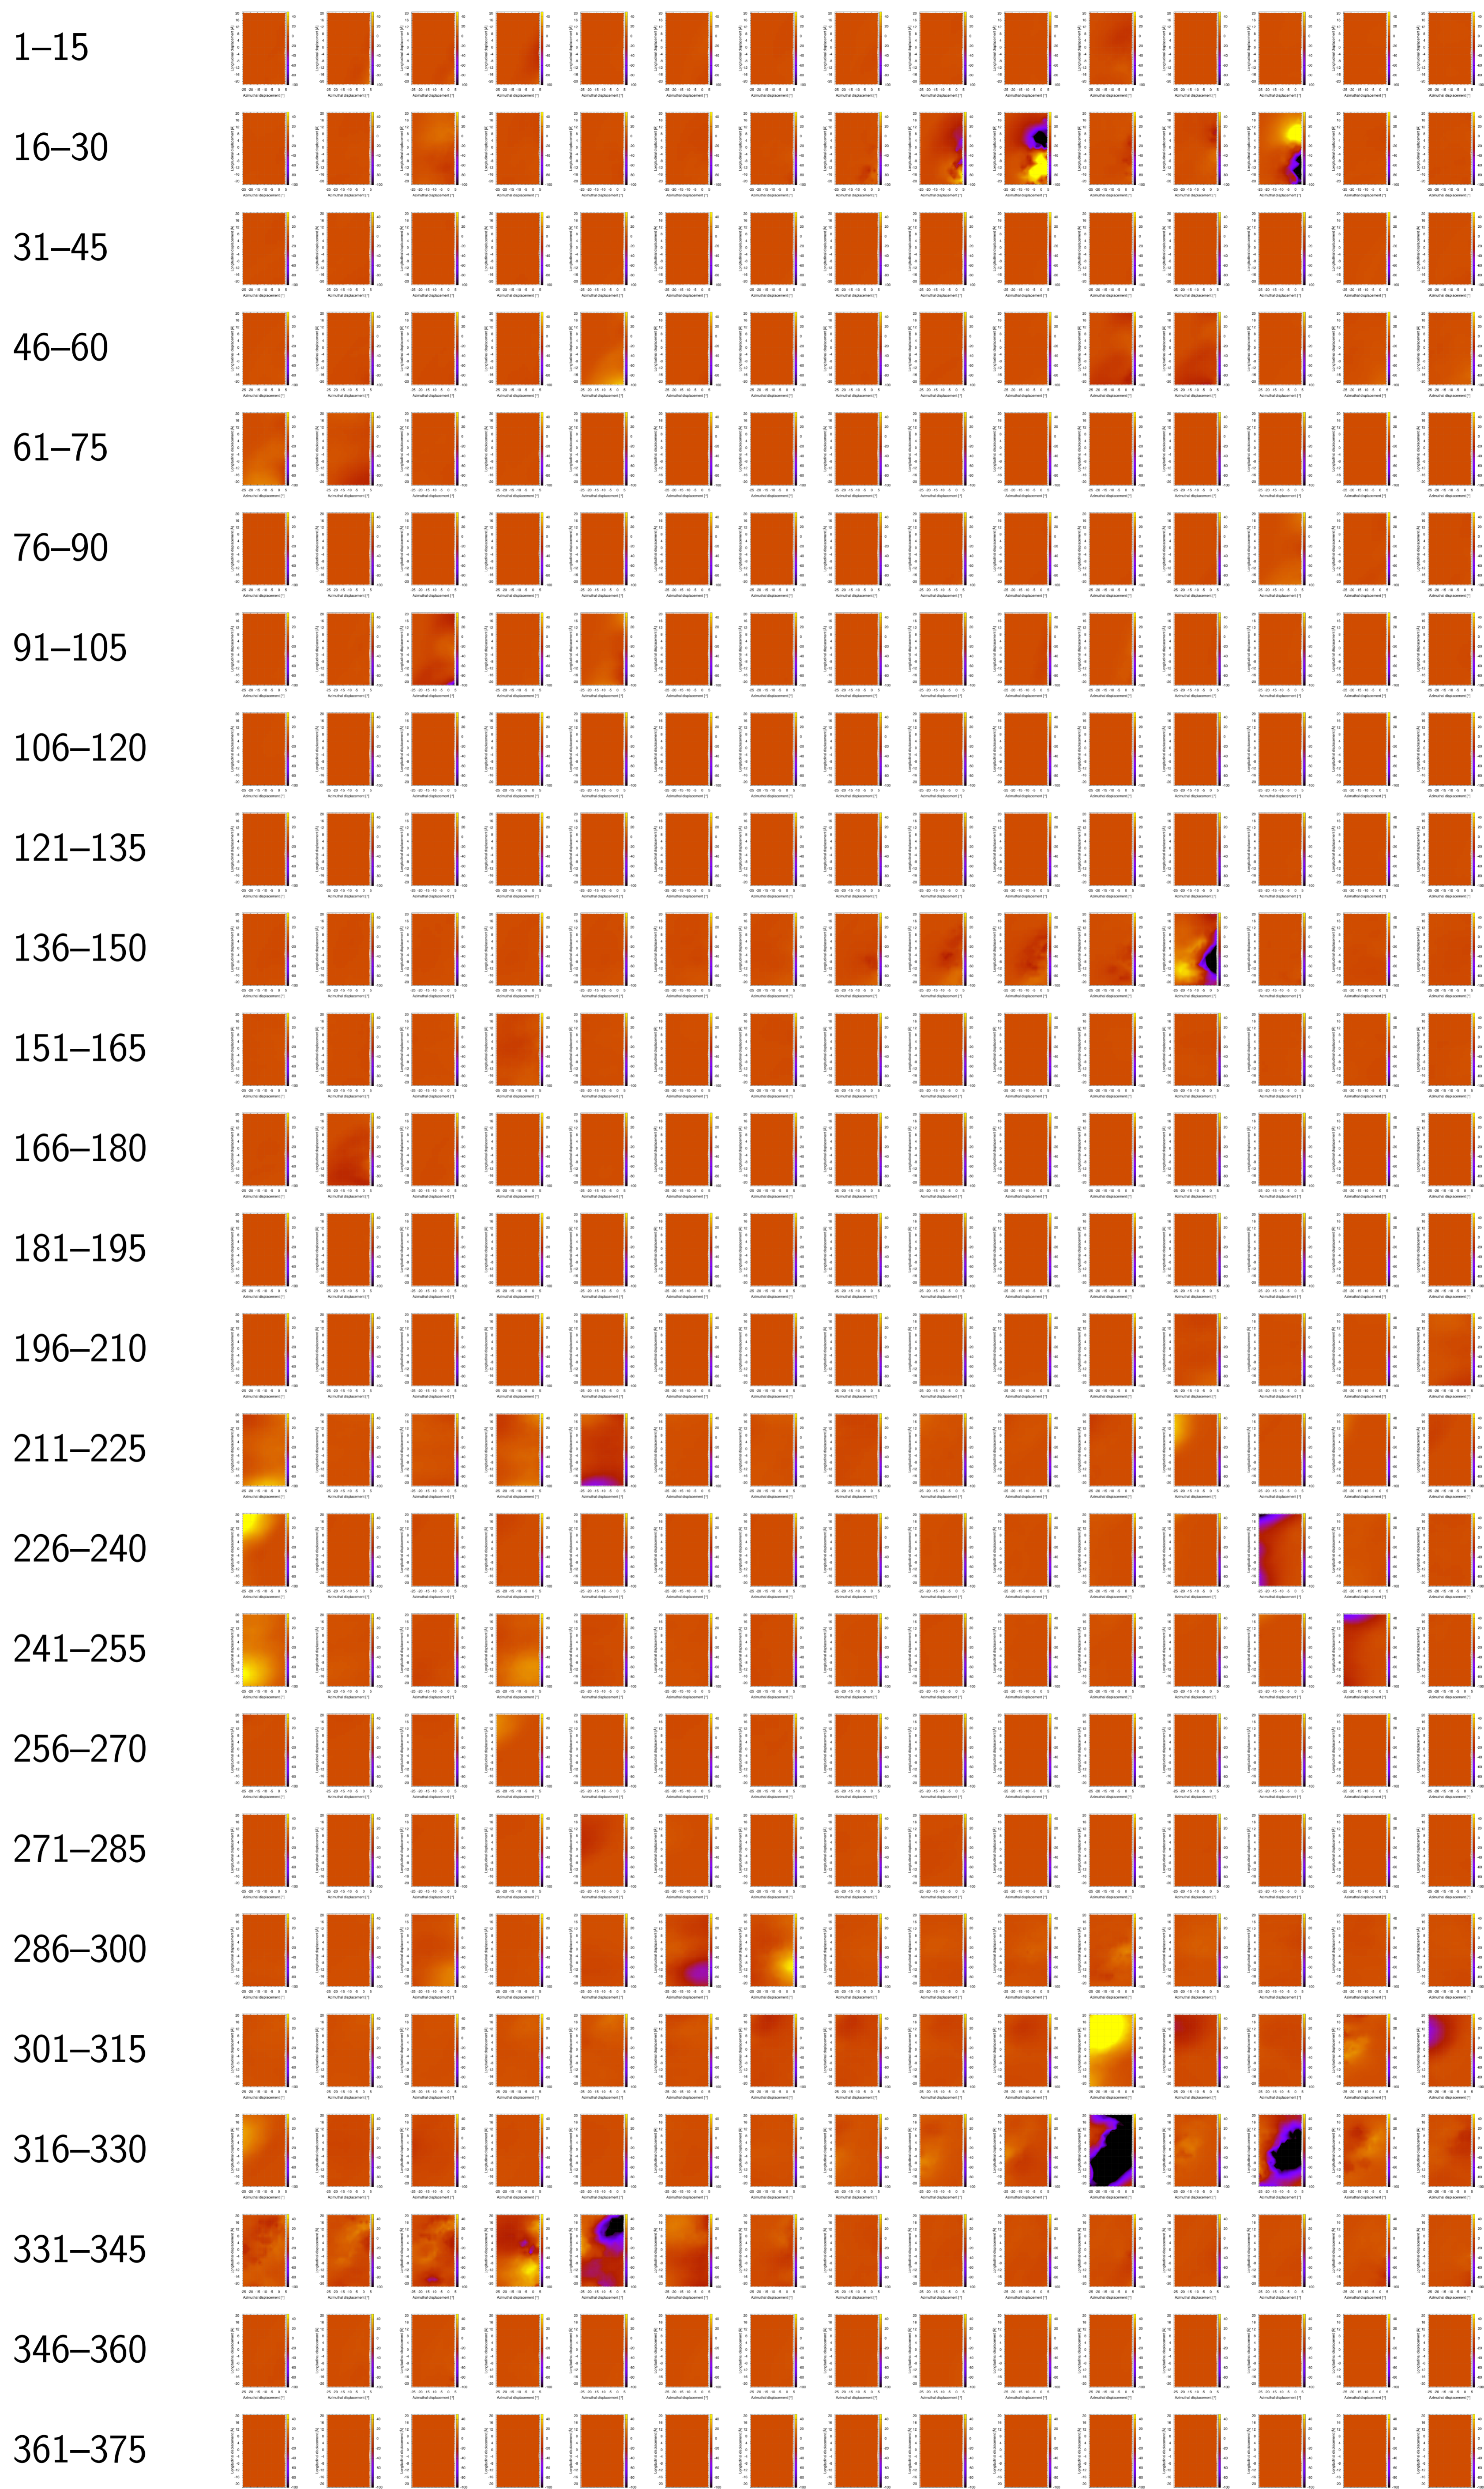

Figure S2. Energy landscapes showing contributions of all individual actin residues to the interaction of actin and tropomyosin, with the interaction energy noted by color level as in Figure 2.
